# Supplementary material for: Electrophysiological model of human temporal contrast sensitivity based on SSVEP
Source: Frontiers journal article supplement (doi:10.3389/fnins.2023.1180829), 2023-07-31
Supplement: Data_Sheet_1.PDF [file Data_Sheet_1.PDF]

## Supplementary Material

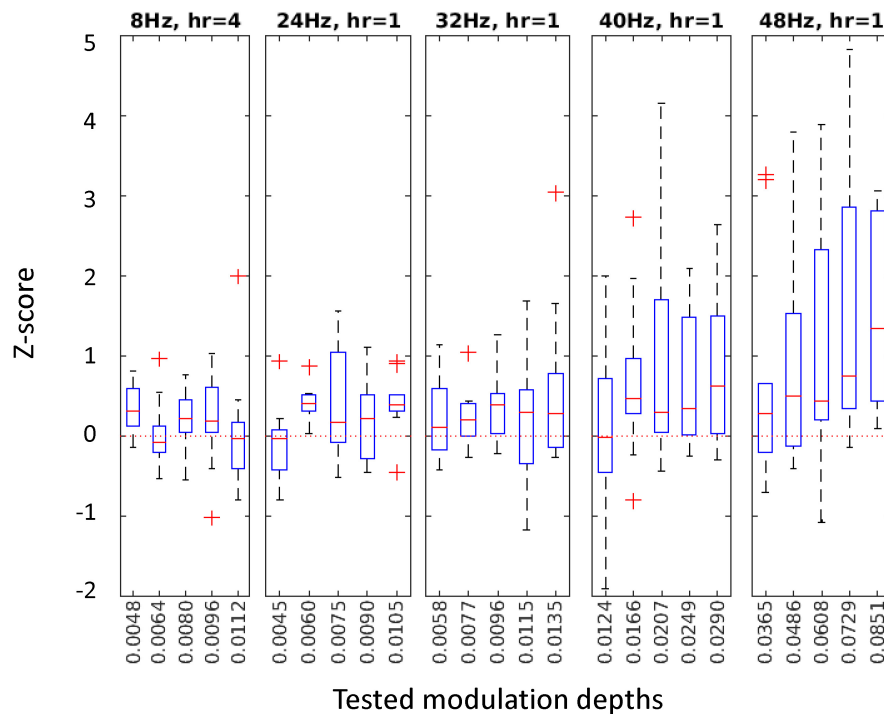

**Figure S1.** *z-score* distributions at the best harmonic component for each condition in Experiment 1. Different frequencies with their selected harmonic component in separate panels, tested MDs on the horizontal axes.

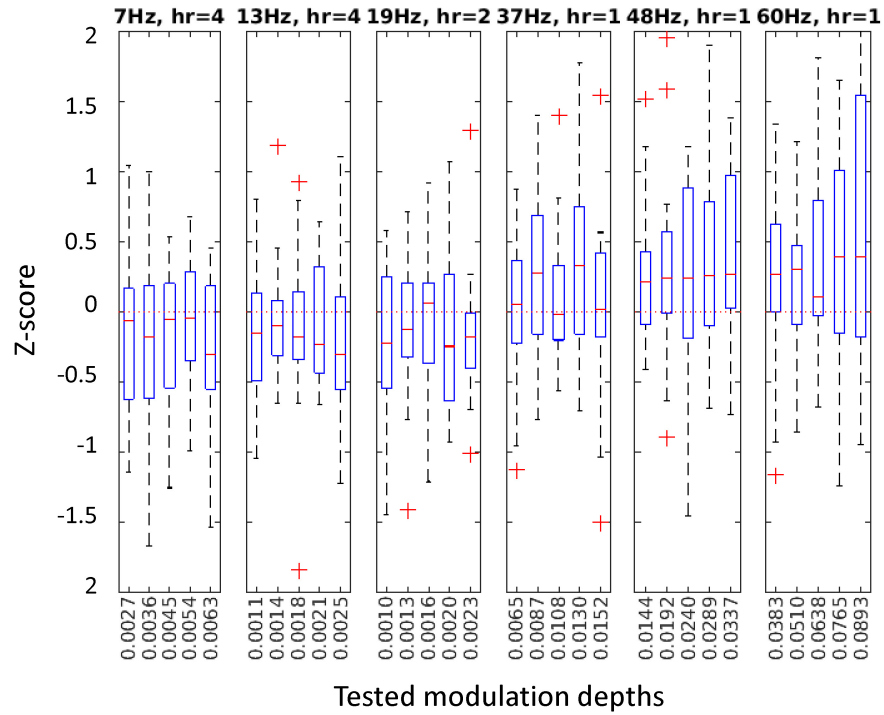

**Figure S2.** *z-score* distributions at the best harmonic component for each condition in Experiment 3. Different frequencies with their selected harmonic component in separate panels, tested MDs on the horizontal axes.

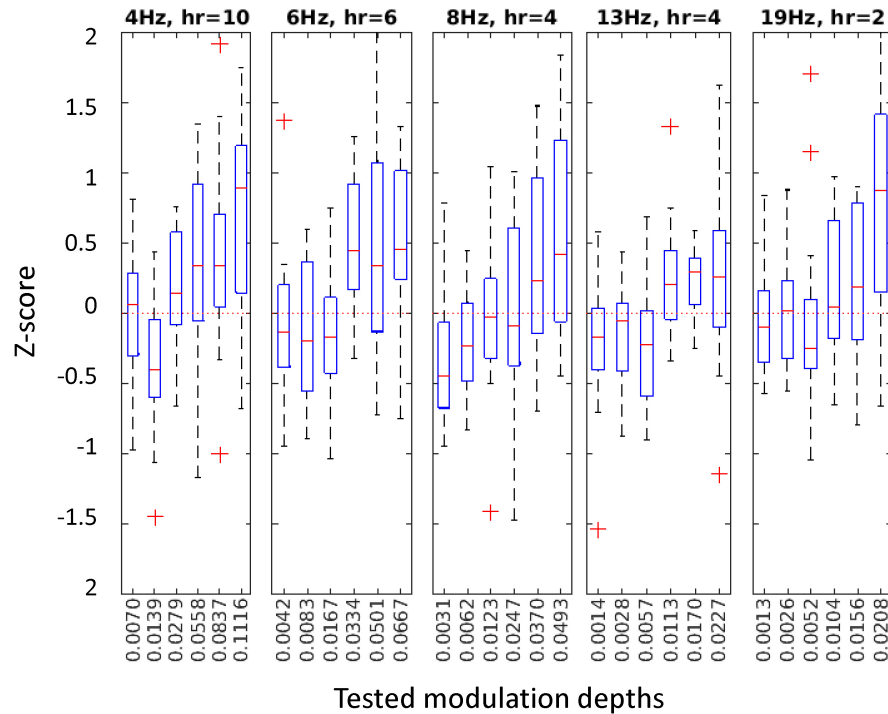

**Figure S3.** *z-score* distributions at the best harmonic component for each condition in Experiment 4. Different frequencies with their selected harmonic component in separate panels, tested MDs on the horizontal axes.
